# Supplementary material
Source: PubMed Central journal article supplement (PMC6015772)

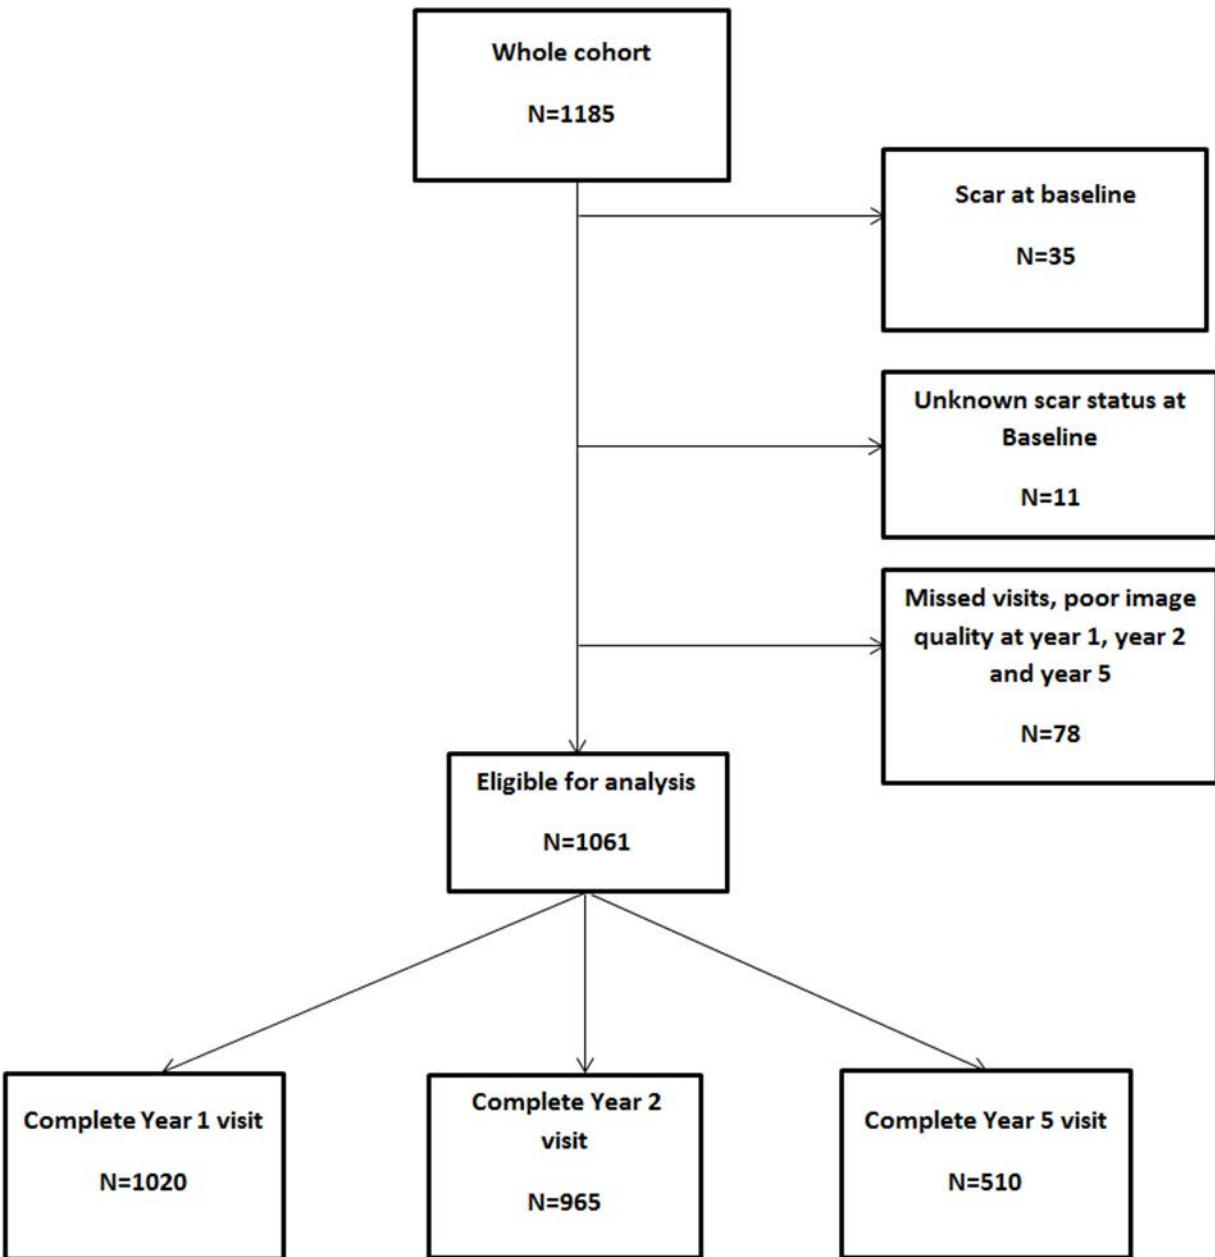

Supplement: NIHMS942180-supplement-Figure_2.pdf [file NIHMS942180-supplement-Figure_2.pdf]
